# Supplementary material
Source: PubMed Central journal article supplement (PMC9365317)
Supplement: mmc1.pdf [file mmc1.pdf]

# THE LANCET Microbe

## Supplementary appendix

This appendix formed part of the original submission. We post it as supplied by the authors.

Supplement to: Patel J, Sridhar D. The pandemic legacy of antimicrobial resistance in the USA. *Lancet Microbe* 2022; published online Aug 10. [https://doi.org/10.1016/S2666-5247\(22\)00227-0](https://doi.org/10.1016/S2666-5247(22)00227-0).

**Appendix**

Page 1 – Supplementary figure 1

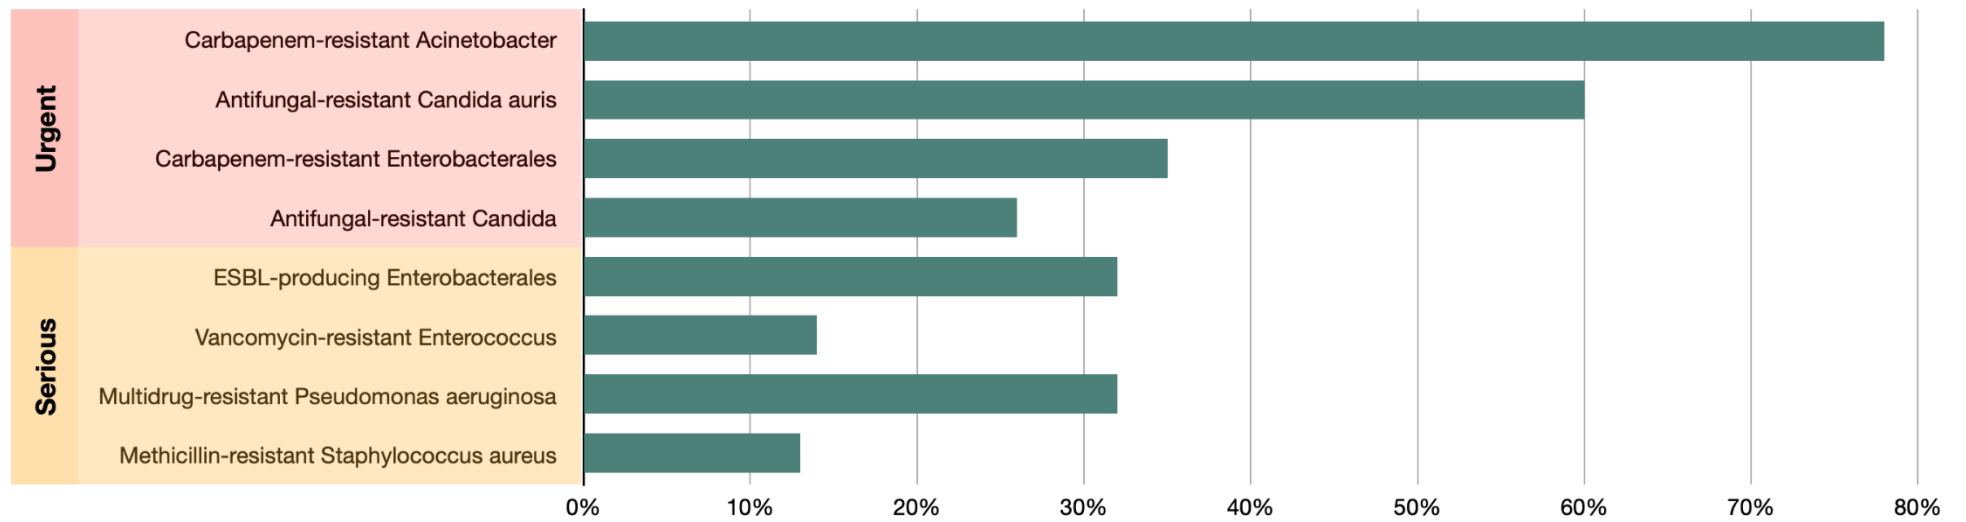

**Figure 1:** Increase in the rate of healthcare-associated drug-resistant infections between 2019–2020 in US hospitals, by pathogen
